# Supplementary material
Source: PubMed Central journal article supplement (PMC8595949)
Supplement: mmc1.pdf [file mmc1.pdf]

**The American Journal of Human Genetics, Volume 108**

**Supplemental information**

**Human iPSC-derived neurons reveal early  
developmental alteration of neurite outgrowth in the  
late-occurring neurodegenerative Wolfram syndrome**

**Sandra Pourtoy-Brasselet, Axel Sciauvaud, Maria-Gabriela Boza-Moran, Michel Cailleret, Margot Jarrige, Hélène Polvèche, Jérôme Polentes, Eric Chevet, Cécile Martinat, Marc Peschanski, and Laetitia Aubry**

## **Supplemental Data**

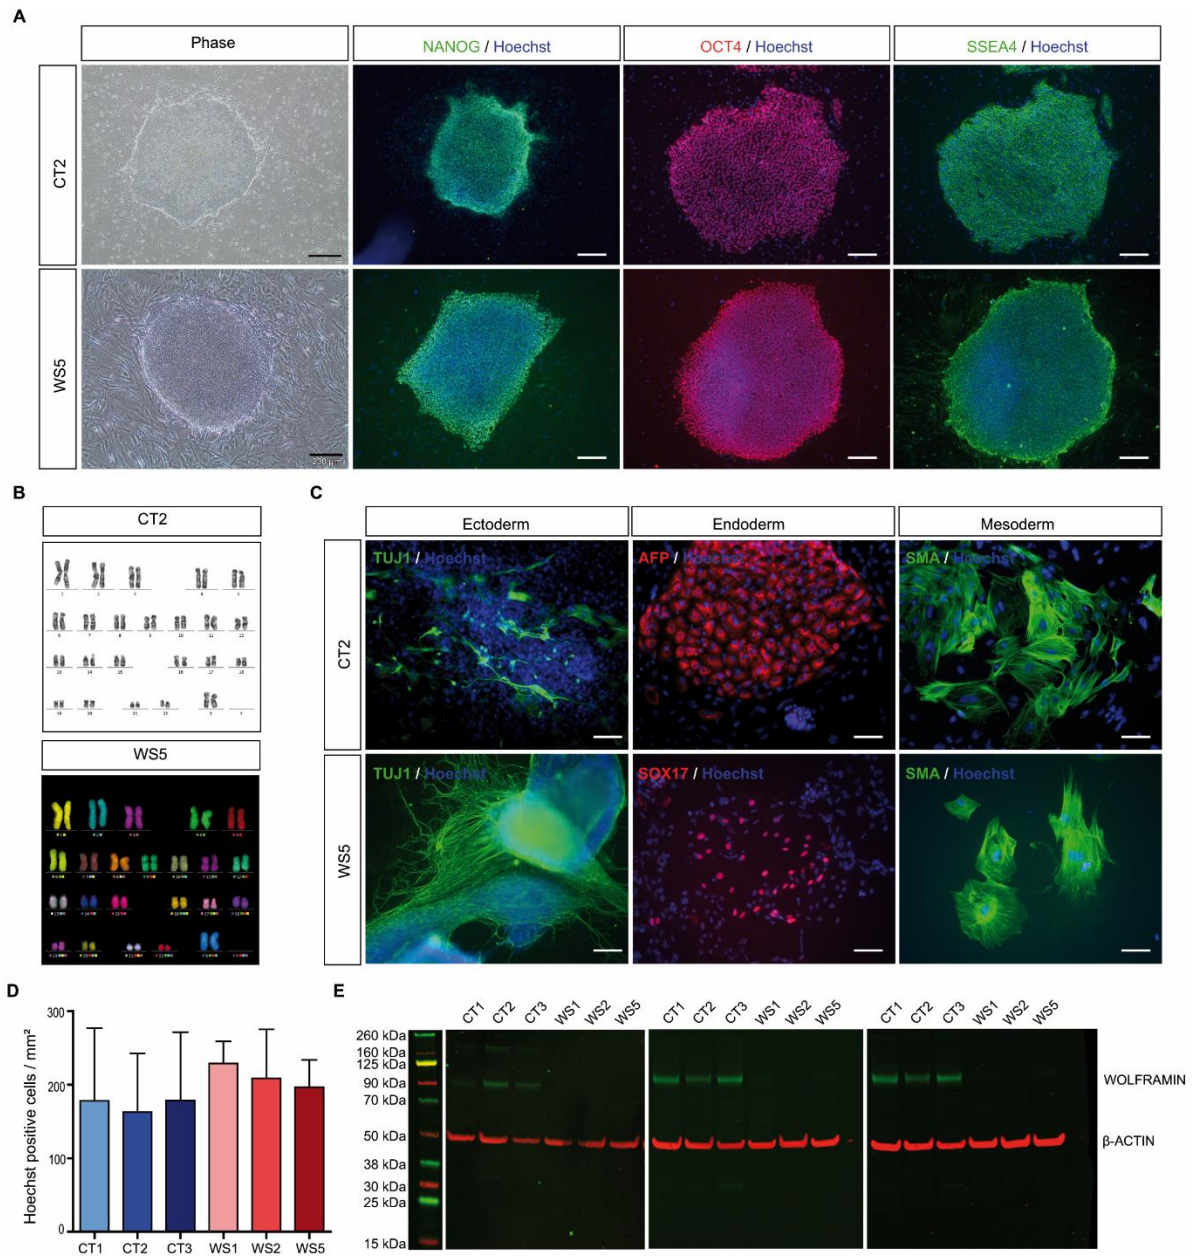

**Figure S1: Characterization of CT2 and WS5 iPSC lines and quantification of the number of cells in CT and WS neuronal culture. A.** Phase contrast images of CT2 and WS5 iPSCs and immunostaining of the pluripotency markers NANOG, OCT4 and SSEA4. Scale bars, 200  $\mu$ m. **B.** G-banding and mFISH (46, XX). **C.** Three germ layer differentiation in *in vitro* embryoid bodies. Scale bars, 200  $\mu$ m. **D.** Quantification of the number of cells (Hoechst) in CT and WS neuronal culture at DIV 14 from NSC stage. **E.** Western blot images of wolframin in CT and WS neurons at DIV 21 (related to Figure 1D for left panel; n = 3 biologically independent differentiations).

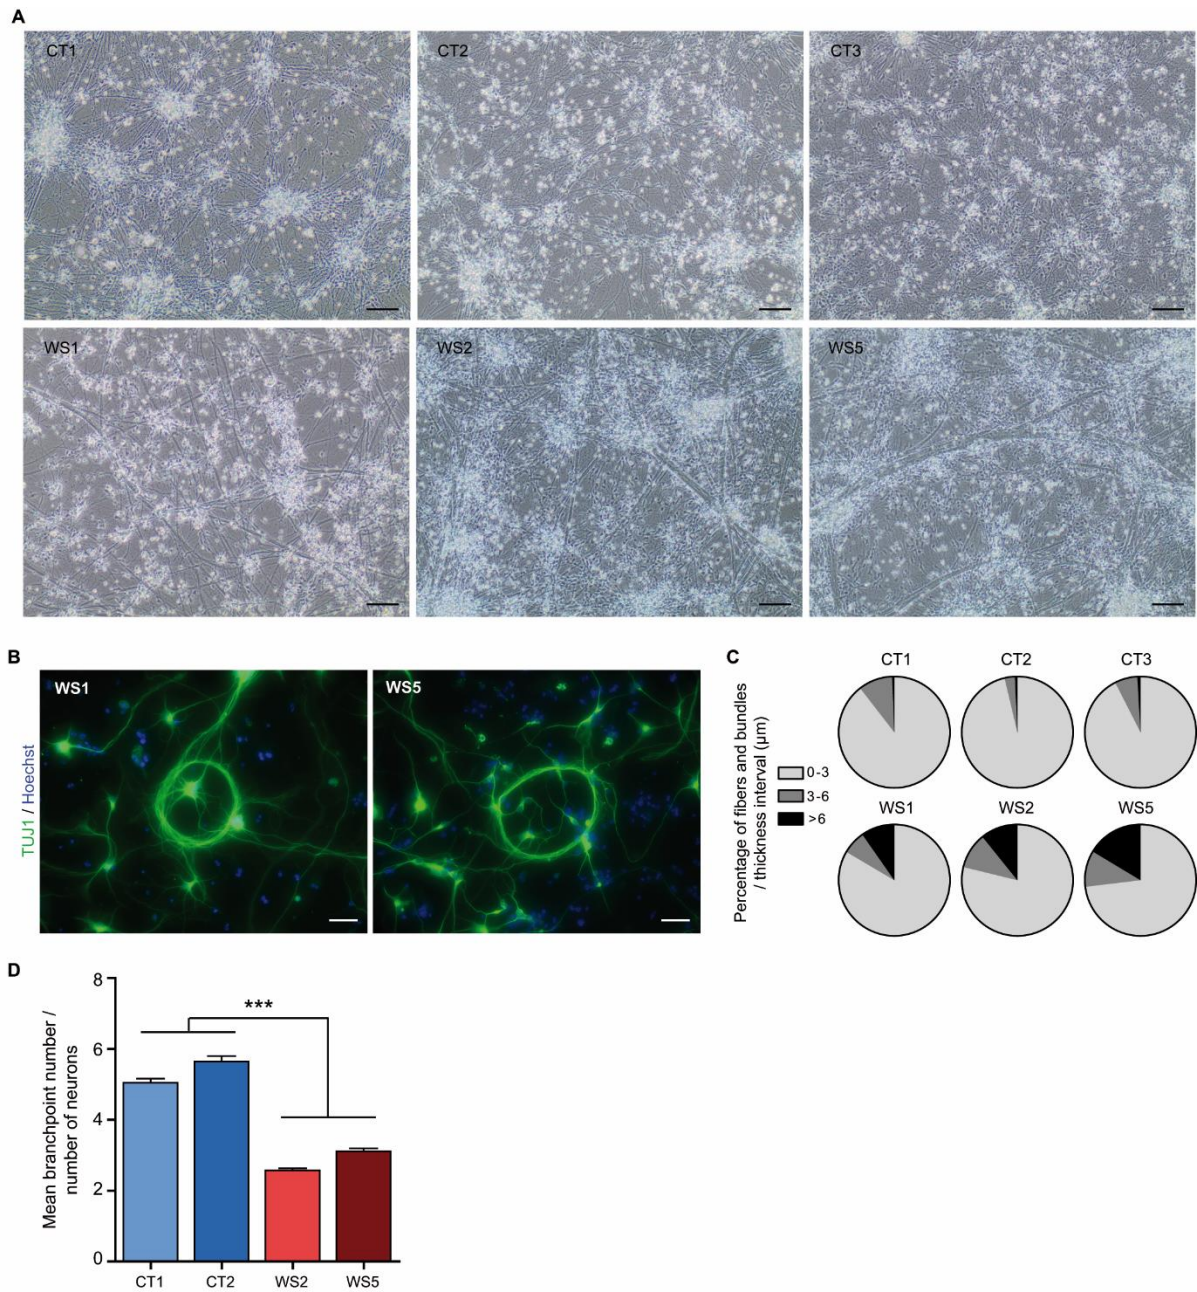

**Figure S2: Abnormal neurite outgrowth in WS neurons. A.** Phase contrast images of CT and WS neuronal network at DIV 14. Scale bars, 200  $\mu\text{m}$ . **B.** TUJ1 immunostained loop structures. Scale bars, 50  $\mu\text{m}$ . **C.** Proportion of isolated and bundled neurites for three thickness intervals (0 - 3; 3 - 6 and > 6  $\mu\text{m}$ ) in CT and WS neurons. **D.** Mean branchpoint number per number of neurons. Data are presented as mean  $\pm$  SEM ( $n = 1$  differentiation; 43 technical replicats; \*\*\* $p < 0.001$ ; Student's t-test).

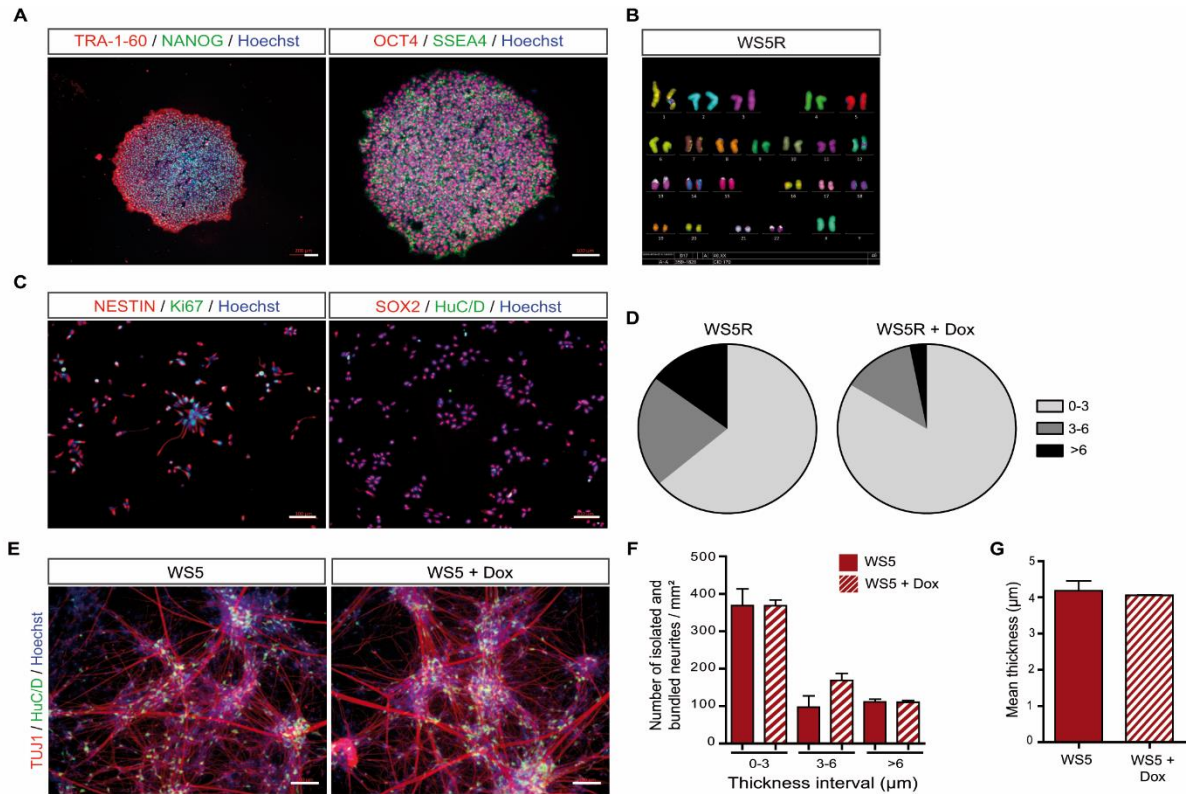

**Figure S3: Characterization of WS5 rescue (WS5R) iPSCs, NSCs and neurons.** **A.** Characterization of WS5R iPSCs by immunostaining of the pluripotency markers TRA-1-60, NANOG, OCT4, SSEA4. Scale bars, 100 μm. **B.** mFISH chromosome analysis of WS5R iPSC line showing a normal karyotype (46, XX). **C.** Immunostaining of the neural (NESTIN and SOX2), the neuronal (HuC/D) and the proliferation (Ki67) markers in WS5R-derived NSCs. Scale bars, 100 μm. **D.** Proportion of isolated and bundled neurites per each thickness interval (0 - 3; 3 - 6 and > 6 μm) of WS5R neurons at DIV 21. **E.** TUJ1 and HuC/D immunostaining of the parental WS5 neurons at DIV 21 under doxycycline (Dox) treatments. Scale bars, 100 μm. **F.** Quantification of the number of isolated and bundled neurites per mm<sup>2</sup> for each thickness interval (0 - 3; 3 - 6 and > 6 μm) at DIV 21 in the parental WS5 neurons treated with doxycycline. Data are presented as mean ± SEM (n = 3 biologically independent differentiations; No statistical difference was observed using one-way ANOVA with Dunnett's post hoc test). **G.** Mean thickness of the parental WS5 neurons at DIV 21 under doxycycline treatments. Data are presented as mean ± SEM (n = 3 biologically independent differentiations; No statistical difference was observed using Student's t-test).

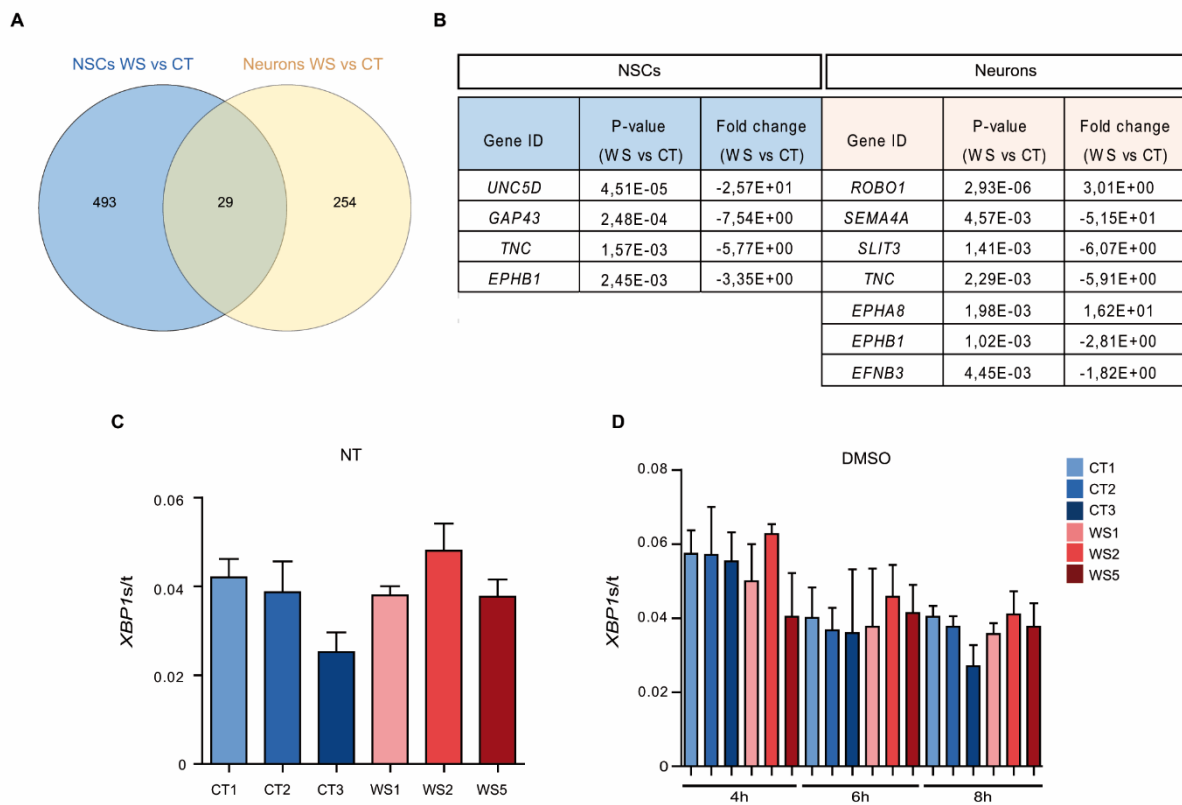

**Figure S4: Gene expression analysis between CT and WS NSCs and neurons.** **A.** Venn diagram summarizing the number of DEGs specific or common to NSCs and neurons. **B.** Table of axon guidance genes deregulated in WS NSCs and neurons. **C. and D.** Controls of thapsigargin (TG) treatments. Quantification of *XBP1s* expression normalized to total *XBP1* (*XBP1t*) in non-treated (**C**) and in DMSO treated (**D**) CT and WS NSCs after 4, 6 and 8 hours. Data are presented as mean  $\pm$  SEM ( $n = 3$  biologically independent experiments;  $*p < 0.05$ ; No statistical difference was observed using one-way ANOVA with Dunnett's post hoc test).

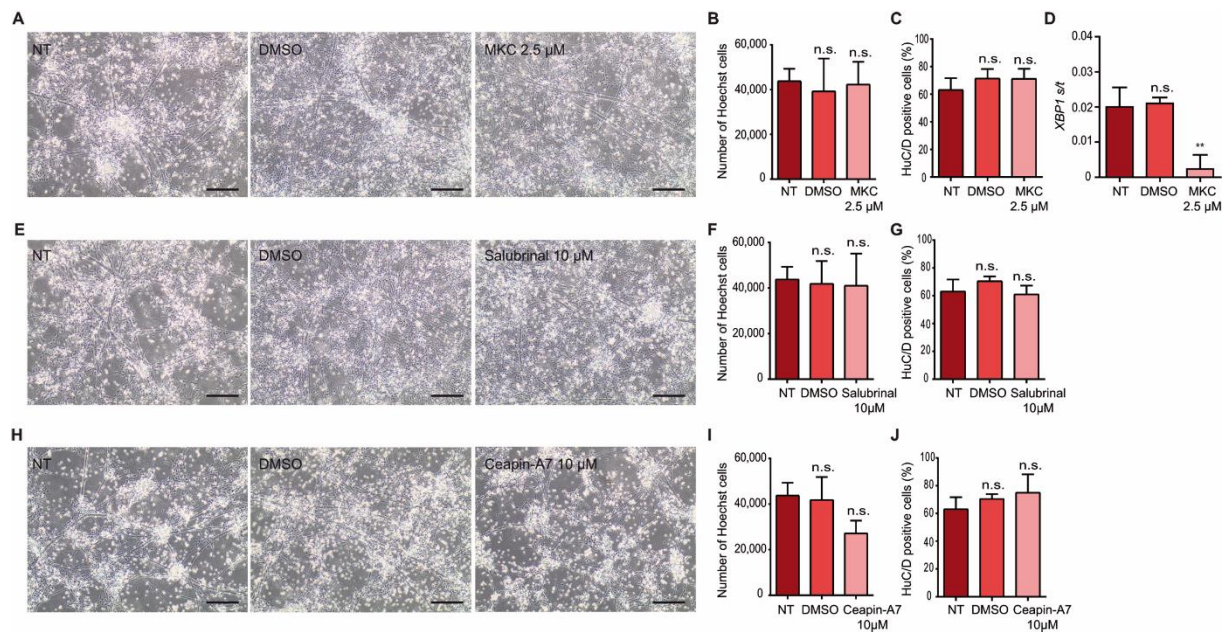

**Figure S5: Effect of UPR pathways inhibition on the abnormal neurite outgrowth in WS5 neurons.**

**A.** Phase contrast images of WS5 neurons at DIV 18 treated or not with 2.5  $\mu$ M MKC-8866 (MKC) or control DMSO. Scale bars, 200  $\mu$ m. **B.** and **C.** Quantification of the number of cells (Hoechst) (**B**) and of the percentage of neurons (HuC/D) (**C**) after MKC treatment. **D.** Analysis of spliced *XBP1* (*XBP1s*) expression normalized to total *XBP1* (*XBP1t*) in WS5 neurons treated with 2.5  $\mu$ M MKC or control DMSO. **E.** Phase contrast images of WS5 neurons at DIV 18 treated or not with 10  $\mu$ M salubrinal or control DMSO. Scale bars, 200  $\mu$ m. **F.** and **G.** Quantification of the number of cells (Hoechst) (**F**) and of the percentage of neurons (HuC/D) (**G**) after salubrinal treatment. **H.** Phase contrast images of WS5 neurons at DIV 18 treated or not with 10  $\mu$ M ceapin-A7 or control DMSO. Scale bars, 200  $\mu$ m. **I.** and **J.** Quantification of the number of cells (Hoechst) (**I**) and of the percentage of neurons (HuC/D) (**J**) after ceapin-A7 treatment. For all analyses, data are presented as mean  $\pm$  SEM ( $n = 3$  biologically independent differentiations; \*\* $p < 0.01$ ; one-way ANOVA with Dunnett's post hoc test).

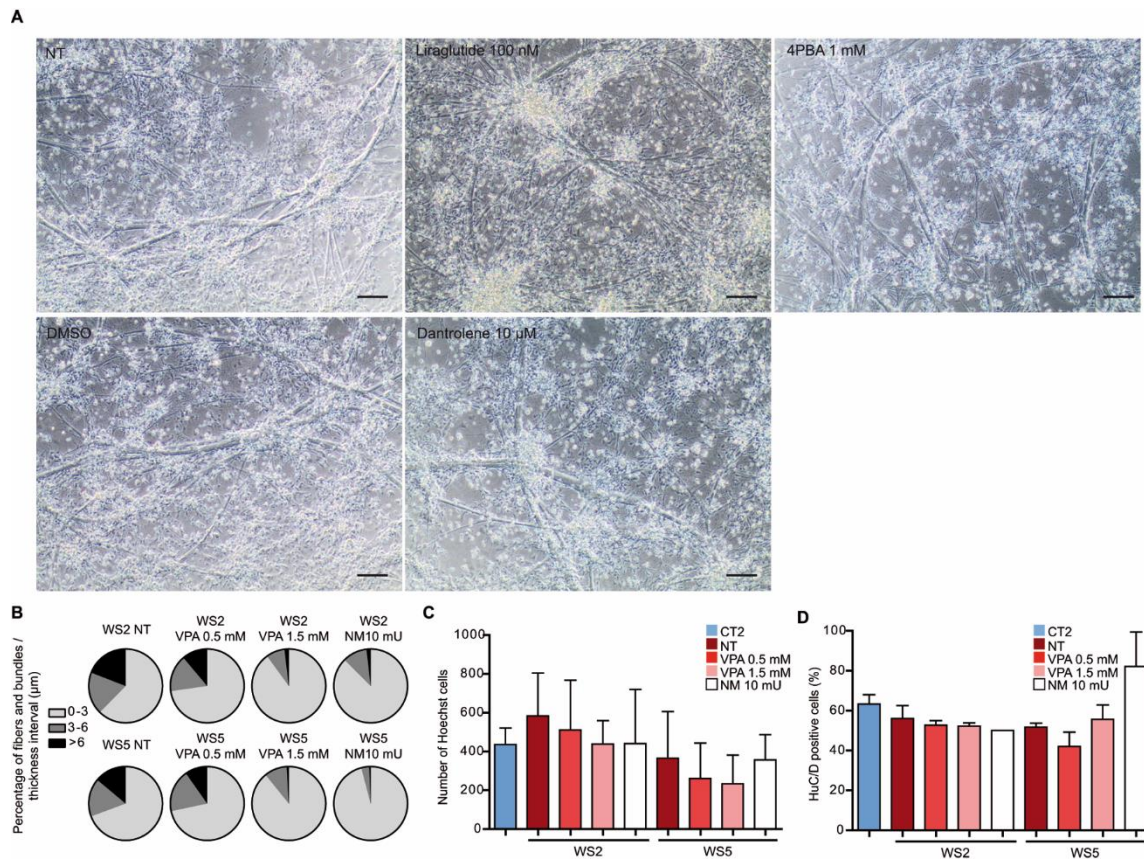

**Figure S6: Effect of drugs treatments on the neurite outgrowth defect in WS5 neurons. A.** Phase contrast images of WS5 neurons at DIV 18 treated or not (NT) with 10  $\mu$ M dantrolene, 100 nM liraglutide or 1 mM 4-phenylbutyric acid (4PBA). Scale bars, 200  $\mu$ m. **B.** Repartition profile of the percentage of isolated and bundled neurites per thickness intervals after VPA treatments. **C.** and **D.** Quantification of the number of cells (Hoechst) (**C**) and of the percentage of neurons (HuC/D) (**D**) after VPA treatments. Data are presented as mean  $\pm$  SEM ( $n = 3$  biologically independent differentiations; \* $p < 0.05$ ; No statistical difference was observed using one-way ANOVA with Dunnett's post hoc test, data are compared to CT2 cells).



**Table S1: Information on iPSC cell lines.**

| iPSC lines | Source of iPSC                | Mutations in <i>WFS1</i> gene                                      | Sex    | Clinical features                                                            |
|------------|-------------------------------|--------------------------------------------------------------------|--------|------------------------------------------------------------------------------|
| WS1        | New York Stem Cell Foundation | c.1230-1233delCTCT<br>[p.Val412fs*440]; c.2171C>T<br>[p.Pro724Leu] | Male   | Diabetes mellitus; optic atrophy; cognitive disabilities                     |
| WS2        | New York Stem Cell Foundation | c.1230-1233delCTCT<br>[p.Val412fs*440]                             | Female | Diabetes mellitus; optic atrophy; cognitive disabilities; diabetes insipidus |
| WS5        | I-Stem                        | c.1060-1062delTTC<br>[p.Phe354del]; c.1676C>A<br>[p.Ala559Asp]     | Female | Diabetes mellitus; optic atrophy                                             |
| CT1        | I-Stem                        | None                                                               | Male   | N/A                                                                          |
| CT2        | I-Stem                        | None                                                               | Female | N/A                                                                          |
| CT3        | I-Stem                        | None                                                               | Female | N/A                                                                          |

**Table S2: List of antibodies, hosts, providers and dilutions.**

| Application                      | Antibody                                      | Host                    | Provider                  | Dilution |
|----------------------------------|-----------------------------------------------|-------------------------|---------------------------|----------|
| <b>Immunostaining</b>            | OCT4                                          | Rabbit                  | Cell Signaling Technology | 1/200    |
|                                  | TRA-1-60                                      | Mouse                   | Cell Signaling Technology | 1/1000   |
|                                  | NANOG                                         | Rabbit                  | Cell Signaling Technology | 1/800    |
|                                  | SSEA4                                         | Mouse                   | Cell Signaling Technology | 1/500    |
|                                  | TUJ1 (neuron-specific class III beta-tubulin) | Chicken                 | Millipore                 | 1/1000   |
|                                  | SOX17                                         | Goat                    | R&D systems               | 1/200    |
|                                  | SMA                                           | Mouse                   | Agilent Dako              | 1/100    |
|                                  | AFP                                           | Mouse                   | Cell Signaling Technology | 1/100    |
|                                  | NESTIN                                        | Rabbit                  | Millipore                 | 1/500    |
|                                  | Ki67                                          | Mouse                   | Agilent Dako              | 1/500    |
|                                  | HuC/D (Elav family members HuC, HuD)          | Mouse                   | ThermoFisher Scientific   | 1/250    |
|                                  | CUX2 (Cut-Like Homeobox 2)                    | Rabbit                  | Abcam                     | 1/500    |
|                                  | Alexa Fluor™ 555 Donkey anti-rabbit           | Donkey                  | ThermoFisher Scientific   | 1/1000   |
|                                  | Alexa Fluor™ 555 Goat anti-chicken            | Goat                    | ThermoFisher Scientific   | 1/1000   |
|                                  | Alexa Fluor™ 555 Goat anti-mouse              | Goat                    | ThermoFisher Scientific   | 1/1000   |
|                                  | Alexa Fluor™ 488 Chicken anti-rabbit          | Chicken                 | ThermoFisher Scientific   | 1/1000   |
| Alexa Fluor™ 488 Goat anti-mouse | Goat                                          | ThermoFisher Scientific | 1/1000                    |          |
| <b>Western-Blot</b>              | WOLFRAMIN                                     | Rabbit                  | Cell Signaling Technology | 1/500    |
|                                  | β-ACTIN                                       | Mouse                   | Li-Cor Biosciences        | 1/5000   |
|                                  | IRDye 800CW Donkey anti-rabbit                | Donkey                  | Li-Cor Biosciences        | 1/10000  |
|                                  | IRDye 800CW Donkey anti-mouse                 | Donkey                  | Li-Cor Biosciences        | 1/10000  |

**Table S3: List of primers used for PCR and qPCR.**

| Gene   | Primer  | 5'-3' Sequence         |
|--------|---------|------------------------|
| 18S    | Forward | GAGGATGAGGTGGAACGTGT   |
|        | Reverse | TCTTCAGTCGCTCCAGGTCT   |
| XBP1   | Forward | GAAGCCAAGGGGAATGAAGT   |
|        | Reverse | GGGAAGGGCATTGAAGAAC    |
| UNC5D  | Forward | ATACCCAATGCCAAAGGC     |
|        | Reverse | TTCAAAATGACAGCAGATGGGC |
| SLIT3  | Forward | GCGATTTGGAGATCCTTACCCT |
|        | Reverse | AGTCGCAGTACAGGTGGTTG   |
| TNC    | Forward | TCTGATGGGGTGGATGGAT    |
|        | Reverse | CTTCTCTGCGGTCCCAAT     |
| EPHB1  | Forward | TCTTCGAGCCCAACCAGAAC   |
|        | Reverse | TCTGTGTAGATGCGATGGGC   |
| SEMA4A | Forward | CTTGGTGGATGGGATGCTCTA  |
|        | Reverse | GGAGGAAGTTGTCGGTCTTG   |
